# Supplementary material for: Total Hip Arthroplasty Using a Short-Stemmed Femoral Component in the Presence of a Long Dynamic Condylar Screw Osteosynthesis Plate
Source: Case Rep Orthop. 2014 Sep 30;2014:725403. doi: 10.1155/2014/725403 (PMC4199077; doi:10.1155/2014/725403)
Supplement: Supplementary file 1 — A 72 year-old man, ASA 4, presenting groin pain irradiated to the thigh with a history of an intersubtrochanteric left hip fracture treated at another institution 8 years before. Radiographs showed fracture consolidation in 10° of varus and 1.5 shortening of the left leg, with bone ingrowth along the distal 2/3 of the osteosynthesis plate. We indicated a short-stemmed prosthesis in order to avoid plate removal and decrease postoperative morbidity. The operation was performed using epidural anaesthesia in a laminar flow room in lateral decubitus using a posterolateral approach. First step was removal of the three most proximal screws of the dynamic condylar screw plate. Then posterior dislocation was performed and femoral neck cut was done with 4 sliced cuts to allow dynamic screw visualization. Removal of this screw was performed in an anterograde way as it is not possible to take it away in a retrograde fashion without plate removal. The acetabular cup was first performed with the use of a 58 mm external diameter Trinity cup (Corin, Cirencester, UK) implanting a 40 mm ceramic liner (BIOLOX® delta, CeramTec AG, Plochingen, Germany) in order to achieve the most stable possible hip in a patient with such comorbidities. Femoral broaching was performed with the use of an image intensifier in order to avoid cortical perforations. Trial reduction was performed according to general rules and trying to equalize limb lengthening. A number 2 MiniHip stem (Corin, Cirencester, UK)) was implanted with a 40 mm ceramic femoral head (BIOLOX® delta, CeramTec AG, Plochingen, Germany) (Multimedia 1). Total operative time was 75 minutes. Postoperative radiographs showed no femoral perforations and equalization of limb length. The patient spent 24 hs in intensive care unit and then started weightbearing as tolerated with a walker during 2 weeks, followed by a 2 week period with a cane. No clinical complications were observed. [file 725403.f1.zip]

Archive with 2 entries (1 files):
- 725403.f1/
- 725403.f1/mat.725403.v2.m4v
